# Supplementary material
Source: HighWire-hosted journal article supplement (https://www.cmajopen.ca/highwire/filestream/89019/field_highwire_adjunct_files/0/open-2021-0159-1-at.pdf)
Supplement: open-2021-0159-1-at.pdf [file open-2021-0159-1-at.pdf]

## Interview Guide:

Hello, my name is Dr Kyle Irvine, I am a general surgery resident, I work with Dr \_\_\_\_\_.  
Thank you so much for your interest in my research project. We really appreciate you taking the time to participate in the interview portion of the project.

The telephone interview will take approximately five to ten minutes.  
We will start by going over a consent form so you know what the project entails and what we will be doing with the data we collect.

- 1) Was your recent appointment conducted over the telephone or by video conference?
- 2) Was your recent appointment an initial consultation or follow up appointment?
- 3) Overall, how satisfied were you with the process of the appointment?
- 4) What particular aspects of the appointment went well?
- 5) What particular aspects of the appointment didn't go well?
- 6) Any concerns about privacy of your information?
- 7) Do you feel as though the care provided was compromised in any way by doing the appointment over the phone/video conference?
- 8) If you thought the care provided was compromised, please describe in what ways:
- 9) Did the telephone/video appointment save you time and/or money as opposed to an in-person appointment? (For example, are you "out of pocket" when traveling to in-person appointments?)
- 10) If the remote consultation did save you time and/or money, please explain in what ways:
- 11) Did you prefer the telephone/video appointment to an in-person appointment? If so, what did you prefer about it?
- 12) Would you be willing to use the remote consultation process in the future? Please give a few reasons why.
- 13) Do you have any other questions or comments you would like to make?

Thank you so much for taking the time to answer my questions.
